# Supplementary material
Source: publisher figshare collection journal article supplement (https://sage.figshare.com/ndownloader/files/16258931)
Supplement: Supplementary file 1 [file 16258931]

**References for Studies Included in Meta-Analysis**

Balbo, L. (2010). The message framing of health communications: how to elicit higher intention to get an annual pap test? Retrieved from: <https://halshs.archives-ouvertes.fr/halshs-00534779/>

Bassett-Gunter, R. L., Latimer-Cheung, A. E., Martin Ginis, K. A., & Castelhano, M. (2014). I spy with my little eye: Cognitive processing of framed physical activity messages. *Journal of Health Communication, 19*, 676–691. doi:10.1080/10810730.2013.837553

Bilandzic, H., Kalch, A., & Soentgen, J. (2017). Effects of goal framing and emotions on perceived threat and willingness to sacrifice for climate change. *Science Communication, 39*, 466-491. doi:10.1177/1075547017718553

Block, L. G. (1993). The effects of perceived efficacy, message framing and vividness on the persuasiveness of a fear appeal (Doctoral dissertation, Columbia University, 1993). *Dissertation Abstracts International, 54* (1994), 2652A. (UMI No. AAC-9333731).

Cho, H., & Boster, F. J. (2008). Effects of gain versus loss frame antidrug ads on adolescents. *Journal of Communication, 58*, 428–446. [doi:10.1111/j.1460-2466.2008.00393.x](http://doi.org/10.1111/j.1460-2466.2008.00393.x)

Detweiler, J. B., Bedell, B. T., Salovey, P., Pronin, E., & Rothman, A. J. (1999). Message framing and sunscreen use: Gain-framed messages motivate beach-goers. *Health Psychology, 18*, 189–196.

Elbert, S. P., & Ots, P. (in press). Reading or listening to a gain- or loss-framed health message: Effects of message framing and communication mode in the context of fruit and vegetable intake. *Journal of Health Communication*. doi:10.1080/10810730.2018.149305

Jensen, J., & Ratcliff, C. (under-review). Framing effects in communication about preventing chronic disease risk: The mediating role of reactance.

Lee, H., & Cameron, G. T. (2017). Utilizing audiovisual and gain-framed messages to attenuate psychological reactance toward weight management health messages. *Health Communication, 32*, 72–81. doi:10.1080/10410236.2015.1099506

Lee-Won, R. J., Na, K., & Coduto, K. D. (2017). The effects of social media virality metrics, message framing, and perceived susceptibility on cancer screening intention: The mediating role of fear. *Telematics and Informatics*, *34*, 1387-1397.

Maheswaran, D., & Meyers-Levy, J. (1990). The influence of message framing and issue involvement. *Journal of Marketing Research*, 361– 367. doi:10.2307/3172593

Mays, D., & Zhao, X. (2016). The influence of framed messages and self-affirmation on indoor tanning behavioral intentions in 18- to 30-Year-Old Women. *Health Psychology, 35*, 123–130. doi:10.1037/hea0000253

Meyerowitz, B. E., & Chaiken, S. (1987). The effect of message-framing on breast self-examination attitudes, intentions, and behavior. *Journal of Personality and Social Psychology, 52,* 500-510.

Millar, M. G., & Millar, K. (2000). Promoting safe driving behavior: The influence of message framing and issue involvement. *Journal of Applied Social Psychology, 30*, 853-866.

Nabi, R. L., Gustafson, A., & Jensen, R. (2018). Framing climate change: Exploring the role of emotion in generating advocacy behavior. *Science Communication*, *40*, 442-468.

Seo, K., & Dillard, J. P. (in press). The persuasive effects of two stylistic elements: Framing and imagery. *Communication Research*. [doi:10.1177/0093650215626979](https://doi.org/10.1080/01463373.2013.822403)

Seo, K., & Dillard, J. P. (under-review). Gain-loss framing and emotional imagery: Testing valence and motivational rules for matching.

Seo, K., & Dillard, J. P. (under-review). A process analysis of message style and persuasion: The effects of gain-loss framing and emotion-inducing imagery.

Seo, K., Dillard, J. P., & Shen, F. (2013). The effects of message framing and visual image on persuasion. *Communication Quarterly*, *61*, 564-583. [doi:10.1080/01463373.2013.822403](https://doi.org/10.1080/01463373.2013.822403)

Spence, A., & Pidgeon, N. (2010). Framing and communicating climate change: The effects of distance and outcome frame manipulations. *Global Environmental Change*, *20*, 656-667. doi:10.1016/j.gloenvcha.2010.07.002

Stark, E., Baldwin, A. S., Hertel, A. W., Rothman, A. J., Stark, E., Baldwin, A. S., … Alexander, J. (2017). Understanding the framing effect: Do affective responses to decision options mediate the influence of frame on choice? *Journal of Risk Research, 9877*, 1–13. doi:10.1080/13669877.2016.1200654

Wong, C. O., & McMurray, N. E. (2002). Framing communication: Communicating the antismoking message effectively to all smokers. *Journal of Community Psychology, 30*, 433–447.

Wong, N. C., Harvell, L. A., & Harrison, K. J. (2013). The unintended target: assessing nonsmokers' reactions to gain-and loss-framed antismoking public service announcements. *Journal of Health Communication*, *18*, 1402-1421. [doi.org/10.1080/10810730.2013.798376](https://doi.org/10.1080/10810730.2013.798376)

Yu, N., Ahern, L. A., Connolly-Ahern, C., & Shen, F. (2010). Communicating the risks of fetal alcohol spectrum disorder: Effects of message framing and exemplification. *Health Communication, 25*, 692–699. doi:10.1080/10410236.2010.521910

Zimmerman, R., Cupp, P. K., Abadi, M., Donohew, R. L., Gray, C., Gordon, L., & Grossl, A. B. (2014). The effects of framing and fear on ratings and impact of antimarijuana PSAs. *Substance use & misuse, 49*, 824-835. doi:10.3109/10826084.2014.880721
